# Supplementary material for: Local patterns of arbuscular mycorrhizal fungal diversity and community structure in a natural Toona ciliata var. pubescens forest in South Central China
Source: PeerJ. 2021 May 3;9:e11331. doi: 10.7717/peerj.11331 (PMC8101450; doi:10.7717/peerj.11331)
Supplement: Supplemental Information 1 — Soil chemical properties of the dominant tree species (analysis results are shown in Tables 1 and 4); the characteristics of the AMF community (pyrosequencing information, composition and diversity) in roots and rhizosphere soil associated with the dominant tree species (analysis results are shown in Tables 2–4 and Figs. 2–4). [file peerj-09-11331-s001.xlsx]

## Sheet: soil nutrients
Forest type	repetition	TN (g kg-1)	TK (g kg-1)	pH	SOM (g kg-1)	TP (g kg-1)	AP (mg kg-1)
Toona ciliata	1	8.3556	6.1406	4.6	179.09	0.95864	5.59
Toona ciliata	2	7.62425	4.0546	4.41	176.5	0.85218	9.73
Toona ciliata	3	4.61119	6.28425	5.51	87.68	0.79994	5.77
Toona ciliata	4	5.22065	3.97575	4.59	134.74	0.6264	6.17
Padus buergeriana	1	8.04685	5.9236	4.51	183.48	0.81273	5.43
Padus buergeriana	2	5.31073	4.3628	4.4	116.41	0.62012	2.23
Padus buergeriana	3	3.97992	4.6674	4.28	86.83	0.68964	5.3
Padus buergeriana	4	6.55042	4.82925	4.09	144.79	0.69873	2.14
Maesa japonica	1	7.04628	4.5348	4.65	130.13	0.93113	7.07
Maesa japonica	2	5.79922	4.3186	4.36	126.79	0.7461	3.98
Maesa japonica	3	4.76227	5.87567	4.31	88.51	0.61779	5.65
Maesa japonica	4	3.75127	2.95925	4.38	80.12	0.26481	1.63

## Sheet: Soil-data
Forest type	repetition	S-Total Sequences	S-Glomeromycota sequence	S-Glomeromycota sequence proportion	S-OTU	S-chao	S-shannon	S-simpson	S-coverage	S-Acaulosporaceae	S-Ambisporaceae	S-Archaeosporaceae	S-Diversisporaceae	S-Geosiphonaceae	S-Gigasporaceae	S-Glomeraceae	S-Paraglomeraceae	S-Unclassified
Toona ciliata	1	42676	33110	77.5846	587	89	2.55909	0.105437	0.999553	0	0.257695	0.0395984	0	2.65583e-05	0.0160678	0.565055	0.000902982	0.120654
Toona ciliata	2	46900	30029	64.0277	361.5	288.533	4.41041	0.019332	0.999627	0.0097469	0.00377128	0.0903514	7.96749e-05	0.000743633	0.0932197	0.545879	0.0537275	0.202481
Toona ciliata	3	40673	28391	69.8031	564.5	102.429	3.36378	0.045148	0.999699	0.0347383	0	0.0482299	0	0.0149789	0.129233	0.512788	0.0140493	0.245983
Toona ciliata	4	41055	34975	85.1906	543	215.2	4.1612	0.023434	0.999309	0.0471676	0.0162537	0.0219372	0.0094282	2.65583e-05	0.0190157	0.726449	0.0885985	0.0711232
Padus buergeriana	1	46726	37179	79.5681	669.5	149.8	3.12747	0.065969	0.99972	0	0.102117	0.0646695	0	0.00164662	0.031445	0.763073	0.0244602	0.0125886
Padus buergeriana	2	50573	33225	65.6971	565.5	286.955	4.17936	0.030362	0.999453	0	0.00398375	0.151143	0	0.00231057	0.1602	0.46477	0.099992	0.1176
Padus buergeriana	3	48230	36800	76.3011	648.5	370.75	2.78941	0.28249	0.999218	5.31166e-05	0.548163	0.0637134	0.000451491	0.00148727	0.0263193	0.28096	0.0561974	0.0226542
Padus buergeriana	4	45209	25623	56.6768	460.5	259.429	3.8093	0.035451	0.99928	0.0263458	0.0202905	0.0466098	2.65583e-05	0.00302765	0.000717074	0.432847	0.150639	0.319496
Maesa japonica	1	50547	37138	73.4722	621.5	181.333	3.44715	0.047656	0.99966	0.0215122	0	0.0206624	0	0.00047805	0.0989297	0.820014	0.0247258	0.0136775
Maesa japonica	2	56876	32474	57.0961	470	343.286	4.49281	0.017412	0.999295	0	0.025974	0.10788	0.000239025	0.000292141	0.0692641	0.555626	0.102993	0.137545
Maesa japonica	3	46652	35703	76.5305	737.5	324.029	4.22321	0.024047	0.999193	0.00613497	0.0429979	0.0928478	0	0.00260271	0.109872	0.635115	0.0586407	0.0517887
Maesa japonica	4	37881	35780	94.4537	518	143	3.49342	0.042549	0.999442	0.103631	0.0269832	0.0531963	0	0.0111014	0.0837118	0.546198	0.125435	0.0497437

## Sheet: Root data
Forest type	repetition	R-Total Sequences	R-Glomeromycota sequence	R-Glomeromycota sequence proportion	R- OTU	R-chao	R-shannon	R-simpson	R-coverage	R-Acaulosporaceae	R-Ambisporaceae	R-Archaeosporaceae	R-Diversisporaceae	R-Geosiphonaceae	R-Gigasporaceae	R-Glomeraceae	R-Paraglomeraceae	R-Unclassified
Toona ciliata	1	40122	30516	76.058	634	527.562	4.26928	0.033042	0.997998	0.0217604	0.00470496	0.00418219	0	0.00039208	0.00212377	0.945338	0.0185585	0.0029406
Toona ciliata	2	54871	30606	55.7781	291	367.8	3.94005	0.056717	0.999382	0.00369209	3.27e-05	0.00166634	0	3.27e-05	0.00744952	0.983043	0.00408417	0
Toona ciliata	3	52999	30369	57.3011	476	471.535	3.98664	0.051426	0.997851	0.0268248	0.00137228	0.00274456	0	0.00117624	0.000849507	0.887179	0.07211	0.00774358
Toona ciliata	4	34079	30398	89.1986	184.5	360.273	2.99704	0.156895	0.999096	0.00405149	0.0004901	0.00274456	0	0.00156832	0.000816833	0.959256	0.0242763	0.00679605
Padus buergeriana	1	58132	30545	52.5442	546.5	350.838	3.70931	0.057789	0.998821	0.00790695	0.00156832	0.00421486	0	0.00019604	0.00385545	0.970888	0.00937725	0.00199307
Padus buergeriana	2	36015	30016	83.3431	647	360.214	3.88879	0.043311	0.99804	0.00398615	0.00205842	0.0306803	0	0.0004901	0.00516239	0.910116	0.0282298	0.0192773
Padus buergeriana	3	58110	30459	52.4161	117	338.784	3.85894	0.045404	0.998842	0.0181664	0.000718813	0.0154545	0	0.00124159	0.00437823	0.908972	0.0462654	0.00480298
Padus buergeriana	4	44843	30195	67.3349	334	362.784	4.10154	0.030847	0.999024	0.00467229	0.00444357	0.0237535	0	0.000163367	0.00751487	0.920408	0.0256159	0.0134287
Maesa japonica	1	31038	30536	98.3826	197	473.775	4.22926	0.042872	0.99844	0.0231654	0.00228713	0.00333268	0	0.00173169	0.00346337	0.927629	0.036104	0.00228713
Maesa japonica	2	42884	30283	70.6161	373.5	470.182	4.11508	0.036492	0.99888	0.00673071	0.00199307	0.019604	0	0.00179703	0.00895249	0.930373	0.0199961	0.0105535
Maesa japonica	3	50821	30340	59.6997		426.036	3.99303	0.034731	0.99894	0.0724695	0.000130693	0.0063713	0	0.00199307	0.00362674	0.894269	0.0124485	0.00869111
Maesa japonica	4	38720	30501	78.7732	457.5	368.556	4.0963	0.032717	0.998535	0.00967131	0.00369209	0.011599	0.00127426	0.0014703	0.00947527	0.940567	0.0188198	0.0034307
